# Supplementary material for: Comprehensive dissection of dispensable genomic regions in Streptomyces based on comparative analysis approach
Source: PubMed Central journal article supplement (PMC7204314; doi:10.1186/s12934-020-01359-4), 2020-05-06

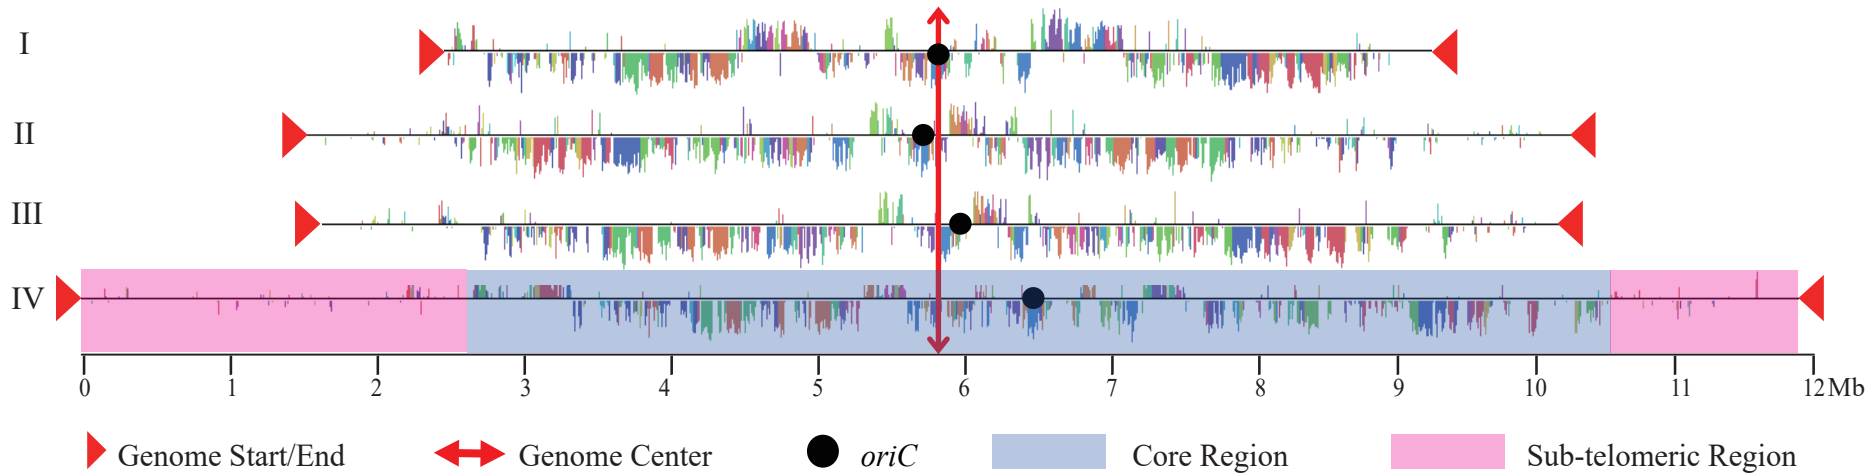

Supplement: 12934_2020_1359_MOESM1_ESM.pdf [file 12934_2020_1359_MOESM1_ESM.pdf]
